# Supplementary material for: Ex post damage assessment: an Italian experience
Source: Copernicus journal article supplement (doi:10.5194/nhess-14-901-2014), 2014-04-17
Supplement: Supplementary file 1 [file nhess-14-901-2014-supplement.pdf]

# **A procedure for field-survey of flood damage data**

**D. Molinari, S. Menoni, G.T. Aronica, F. Ballio, N. Berni, C. Pandolfo**

**Online resource 1: Form for data collection to be implemented in the procedure**

*Notes:*

Three different colours are used in the form:

- Black: for pre-compiled fields
- Blue: for fields to be filled in during survey
- Red: for fields to be filled in after the survey, also on the basis of other sources. In the final version of the form (that will be filled in by collectors during survey) such fields will be deleted but still be present in the database.

Province I.D.   |\_|\_|\_|  
 Municipality I.D.   |\_|\_|\_|  
 Municipality   |\_|\_|\_|\_|\_|\_|\_|\_|\_|\_|\_|\_|\_|\_|\_|\_|\_|  
 Form I.D.   |\_|\_|\_|\_|\_|\_|\_|  
 Date   |\_|\_|   |\_|\_|   |\_|\_|

| SECTION 1 – SURVEY DATA                             |                                                     | Data                                                                                                                                                                                                                                                                                     | Notes | Guidelines                                                                                                                                                                                                                                                                                                |
|-----------------------------------------------------|-----------------------------------------------------|------------------------------------------------------------------------------------------------------------------------------------------------------------------------------------------------------------------------------------------------------------------------------------------|-------|-----------------------------------------------------------------------------------------------------------------------------------------------------------------------------------------------------------------------------------------------------------------------------------------------------------|
| Conditions for survey                               |                                                     | Team I.D.        _ _ <br>Collector I.D.    _ _ _ _ <br><input type="checkbox"/> Support by private citizen<br>Name: _____<br>Surname: _____<br>Tel./e-mail: _____<br>Function:<br><input type="checkbox"/> Owner <input type="checkbox"/> Tenant<br><input type="checkbox"/> Other _____ |       | Supply information on collector and their team. Indicate whether support by private citizen was supplied during the survey. If so, indicate personal details of the citizen, a telephone number/e-mail address and their function, being the owner, the tenant or other (e.g. neighbour, volunteer, etc.) |
| SECTION 2– BUILDING LOCATION                        |                                                     | Data                                                                                                                                                                                                                                                                                     | Notes | Guidelines                                                                                                                                                                                                                                                                                                |
| Geographic coordinates<br>(Datum WGS84, Format DMS) | _ _ °  _ _ '  _ _ _ " N<br> _ _ °  _ _ '  _ _ _ " E | _ _ °  _ _ '  _ _ _ " N<br> _ _ °  _ _ '  _ _ _ " E                                                                                                                                                                                                                                      |       | Validate geographic coordinates. Use the WGS84 datum, DMS (Degree Minutes Seconds) format. If other datum/format is used, please specify in "Notes".                                                                                                                                                      |
| Cadastral coordinate                                | Sheet I.D.    _ _ _ <br>Particle I.D.    _ _ _ _    |                                                                                                                                                                                                                                                                                          |       |                                                                                                                                                                                                                                                                                                           |

|                                        |                                                                                                                                                                                                                                                                   |                                                                                                                                                                                                                                                                                                                                                   |              |                                                                                                                                                                                                                             |
|----------------------------------------|-------------------------------------------------------------------------------------------------------------------------------------------------------------------------------------------------------------------------------------------------------------------|---------------------------------------------------------------------------------------------------------------------------------------------------------------------------------------------------------------------------------------------------------------------------------------------------------------------------------------------------|--------------|-----------------------------------------------------------------------------------------------------------------------------------------------------------------------------------------------------------------------------|
| Address                                | <input type="checkbox"/> street <input type="checkbox"/> avenue<br><input type="checkbox"/> square<br>Other _____<br>Number             _ _ _                                                                                                                     | <input type="checkbox"/> Confirmed<br><input type="checkbox"/> Not Confirmed<br><input type="checkbox"/> street <input type="checkbox"/> avenue<br><input type="checkbox"/> square<br>Other _____<br>Number             _ _ _                                                                                                                     |              | When data are not confirmed, update the information.                                                                                                                                                                        |
| <b>SECTION 3 – BUILDING FEATURES</b>   |                                                                                                                                                                                                                                                                   | <b>Data</b>                                                                                                                                                                                                                                                                                                                                       | <b>Notes</b> | <b>Guidelines</b>                                                                                                                                                                                                           |
| Building typology                      | <input type="checkbox"/> Detached house<br><input type="checkbox"/> Apartment house/semi-detached house<br>Number of housing units  _ _ _ <br><input type="checkbox"/> presence of attached buildings<br><input type="checkbox"/> public building<br>Specify_____ | <input type="checkbox"/> Confirmed<br><input type="checkbox"/> Not Confirmed<br><input type="checkbox"/> Detached house<br><input type="checkbox"/> Apartment house/semi-detached house<br>Number of housing units  _ _ _ <br><input type="checkbox"/> presence of attached buildings<br><input type="checkbox"/> public building<br>Specify_____ |              | When data are not confirmed, update the information.<br><br>Specify building typology and whether attached buildings are present. In the case of apartment house/semi-detached house, indicate the number of housing units. |
| Surface                                |                                                                                                                                                                                                                                                                   | Width         _ _ _ _  m<br>Length         _ _ _ _  m                                                                                                                                                                                                                                                                                             |              |                                                                                                                                                                                                                             |
| Number of storeys (excluding basement) | _ _  N°                                                                                                                                                                                                                                                           | <input type="checkbox"/> Confirmed<br><input type="checkbox"/> Not Confirmed<br> _ _  N°                                                                                                                                                                                                                                                          |              | When data are not confirmed, update the information.<br><br>Indicate the number of storeys, excluding basement.                                                                                                             |

|                        |                                                                                                                                                         |                                                                                                                                                                                                                                                                                                      |  |                                                                                                                                                                    |
|------------------------|---------------------------------------------------------------------------------------------------------------------------------------------------------|------------------------------------------------------------------------------------------------------------------------------------------------------------------------------------------------------------------------------------------------------------------------------------------------------|--|--------------------------------------------------------------------------------------------------------------------------------------------------------------------|
| Presence of basement   | <input type="checkbox"/> No <input type="checkbox"/> Yes       _ _  N°                                                                                  | <input type="checkbox"/> Confirmed<br><input type="checkbox"/> Not Confirmed<br><input type="checkbox"/> No <input type="checkbox"/> Yes       _ _  N°<br><input type="checkbox"/> Basement windows                                                                                                  |  | <p>When data are not confirmed, update the information.</p> <p>Indicate the number of storeys below the ground level and whether basement windows are present.</p> |
| Open space             |                                                                                                                                                         | <input type="checkbox"/> Yes <input type="checkbox"/> No<br><input type="checkbox"/> Court <input type="checkbox"/> Garden<br><input type="checkbox"/> Other _____                                                                                                                                   |  |                                                                                                                                                                    |
| Period of construction | <input type="checkbox"/> before 1945<br><input type="checkbox"/> 1945-1991<br><input type="checkbox"/> 1991-2007<br><input type="checkbox"/> after 2007 | <input type="checkbox"/> Confirmed<br><input type="checkbox"/> Not Confirmed<br><input type="checkbox"/> before 1945<br><input type="checkbox"/> 1945-1991<br><input type="checkbox"/> 1991-2007<br><input type="checkbox"/> after 2007<br><input type="checkbox"/> restoration within last 20 years |  | <p>When data are not confirmed, update the information.</p> <p>Besides age, indicate whether evidence of restoration (within the last 20 years) is present.</p>    |
| Building structure     |                                                                                                                                                         | <input type="checkbox"/> Masonry<br><input type="checkbox"/> Concrete<br><input type="checkbox"/> Steel<br><input type="checkbox"/> Wood<br><input type="checkbox"/> Other _____                                                                                                                     |  | <p>When the building is made up of parts with different structure, please specify in "Notes".</p>                                                                  |

| Level<br>maintenance                   | of | <input type="checkbox"/> Good<br><input type="checkbox"/> Regular<br><input type="checkbox"/> Bad                                                                                                                                                                                                                                       |       | <p>The level of maintenance is to be considered “bad” if, before the flood:</p> <ul style="list-style-type: none"> <li>• pavements were lacking or severely damaged (more than 20% of the total surface);</li> <li>• cover/plaster was lacking or severely damaged (more than 10% of the total surface);</li> <li>• walls were severely damaged;</li> <li>• more than one external openings was lacking or in bad condition;</li> <li>• the electric and plumbing systems were not designed/built according to the law.</li> </ul> <p>When openings, pavements, cover/plaster and roof were new/preciousness and systems were functioning, the level of maintenance is to be considered “good”.<br/>Otherwise, the level of maintenance is to be considered “regular”.</p> |
|----------------------------------------|----|-----------------------------------------------------------------------------------------------------------------------------------------------------------------------------------------------------------------------------------------------------------------------------------------------------------------------------------------|-------|----------------------------------------------------------------------------------------------------------------------------------------------------------------------------------------------------------------------------------------------------------------------------------------------------------------------------------------------------------------------------------------------------------------------------------------------------------------------------------------------------------------------------------------------------------------------------------------------------------------------------------------------------------------------------------------------------------------------------------------------------------------------------|
| SECTION 4 – DESCRIPTION OF FLOOD EVENT |    | Data                                                                                                                                                                                                                                                                                                                                    | Notes | Guidelines                                                                                                                                                                                                                                                                                                                                                                                                                                                                                                                                                                                                                                                                                                                                                                 |
| Duration                               |    | <p>Beginning:</p> <p>Hour                               </p> <p>Date                                   </p> <p>End:</p> <p>Hour                               </p> <p>Date                                   </p> <p>Peak of water depth:</p> <p>Hour                               </p> <p>Date                                   </p> |       | <p>Event beginning and end refer to the period of time in which water was inside the building. Please use the following format:</p> <ul style="list-style-type: none"> <li>• “hh mm” for hour</li> <li>• “dd mm yy” for date</li> </ul>                                                                                                                                                                                                                                                                                                                                                                                                                                                                                                                                    |

|                                               |  |                                                                                                                                                                                                                                           |  |                                                                                               |
|-----------------------------------------------|--|-------------------------------------------------------------------------------------------------------------------------------------------------------------------------------------------------------------------------------------------|--|-----------------------------------------------------------------------------------------------|
| <p>Water depth outside the building</p>       |  | <p>SURVEY POINT:</p> <p>Description: _____</p> <p>_____</p> <p>Water depth       _ _ _  cm</p> <p>Altitude           _ _ _ _  m</p> <p>REFERENCE PLANE:</p> <p>Description: _____</p> <p>_____</p> <p>Altitude             _ _ _ _  m</p> |  | <p>Attach photos in order to univocally identify the survey point and the reference plan</p>  |
| <p>Water depth outside attached buildings</p> |  | <p>SURVEY POINT:</p> <p>Description: _____</p> <p>_____</p> <p>Water depth       _ _ _  cm</p> <p>Altitude           _ _ _ _  m</p> <p>REFERENCE PLANE:</p> <p>Description: _____</p> <p>_____</p> <p>Altitude             _ _ _ _  m</p> |  | <p>Attach photos in order to univocally identify the survey point and the reference plane</p> |

|                          |  |                                                                                                                                                                                                                                                                                            |  |  |
|--------------------------|--|--------------------------------------------------------------------------------------------------------------------------------------------------------------------------------------------------------------------------------------------------------------------------------------------|--|--|
| Presence of sediments    |  | <input type="checkbox"/> Yes <input type="checkbox"/> No<br>Type of sediment:<br><input type="checkbox"/> fine sediments <input type="checkbox"/> garbage<br><input type="checkbox"/> coarse sediments<br><input type="checkbox"/> vegetation/wood<br><input type="checkbox"/> Other _____ |  |  |
| Presence of contaminants |  | <input type="checkbox"/> Yes <input type="checkbox"/> No<br>Type(s) of contaminant(s):<br>_____                                                                                                                                                                                            |  |  |

**SECTION 5 – DAMAGE TO HOUSING UNIT (TO REPEAT FOR EVERY HOUSING UNIT)**

| Section 5A- unit features |                                                                                                                       | Data                                                                                                                                                                                                  | Notes | Guidelines                                                                                                                                                      |
|---------------------------|-----------------------------------------------------------------------------------------------------------------------|-------------------------------------------------------------------------------------------------------------------------------------------------------------------------------------------------------|-------|-----------------------------------------------------------------------------------------------------------------------------------------------------------------|
| Owner                     | Name: _____<br>Surname: _____<br>Place of birth: _____<br>Date of birth:  _ _   _ _   _ _ <br>Address: _____<br>_____ | <input type="checkbox"/> Confirmed<br><input type="checkbox"/> Not Confirmed<br>Name: _____<br>Surname: _____<br>Place of birth: _____<br>Date of birth:  _ _   _ _   _ _ <br>Address: _____<br>_____ |       | When data are not confirmed, update the information.<br><br>In the case of more than one owner, please specify it in “notes” along with data of further owners. |
| Cadastral coordinates     | Sub-Particle  _ _ _                                                                                                   |                                                                                                                                                                                                       |       |                                                                                                                                                                 |
| Surface                   |                                                                                                                       | _ _ _ _  m <sup>2</sup>                                                                                                                                                                               |       |                                                                                                                                                                 |

|                                        |  |                                                                                                                                                                                                                                                                                                                                                                                                                                                                                                                                                     |              |                                                                                                                                                                                                                                                               |
|----------------------------------------|--|-----------------------------------------------------------------------------------------------------------------------------------------------------------------------------------------------------------------------------------------------------------------------------------------------------------------------------------------------------------------------------------------------------------------------------------------------------------------------------------------------------------------------------------------------------|--------------|---------------------------------------------------------------------------------------------------------------------------------------------------------------------------------------------------------------------------------------------------------------|
| Number of storeys (excluding basement) |  | _ _  N°                                                                                                                                                                                                                                                                                                                                                                                                                                                                                                                                             |              | Indicate the number of storeys, excluding basement.                                                                                                                                                                                                           |
| Presence of basement                   |  | <input type="checkbox"/> No <input type="checkbox"/> Yes       _ _  N°<br><input type="checkbox"/> Basement windows<br>Surface       _ _ _ _  m <sup>2</sup>                                                                                                                                                                                                                                                                                                                                                                                        |              | Indicate the number of storeys below the ground level and whether basement windows are present.<br><br>Indicate the surface of every storey, pertaining to the housing unit. In the case of more than one storey, supply single floor information in "Notes". |
| Elevation of ground floor              |  |                                                                                                                                                                                                                                                                                                                                                                                                                                                                                                                                                     | _ _ _  cm    | Elevation of the ground floor with respect to the ground level, in front of the building. If the ground level is irregular, please specify it in "Notes".                                                                                                     |
| <b>Section 5B- Direct damage</b>       |  | <b>Data</b>                                                                                                                                                                                                                                                                                                                                                                                                                                                                                                                                         | <b>Notes</b> | <b>Guidelines</b>                                                                                                                                                                                                                                             |
| Flooded storeys                        |  | <input type="checkbox"/> Basement<br>Use:<br><input type="checkbox"/> box <input type="checkbox"/> cellar<br><input type="checkbox"/> housing <input type="checkbox"/> storage<br><input type="checkbox"/> not in use<br><input type="checkbox"/> under construction/restoration<br><input type="checkbox"/> Other _____<br>Technological systems pertaining to unit:<br><input type="checkbox"/> plumbing system<br><input type="checkbox"/> electrical system<br><input type="checkbox"/> heating system<br><input type="checkbox"/> Ground floor |              | Indicate which storeys were flooded and their use.<br><br>Indicate whether technological systems are present, for every storey.                                                                                                                               |



|                                             |  |                                                                                                                                                                                                                                                                                                                                                                                                                                                                                                                                                                                                                                                                                                                                                                                                                                                                                                                                                                                            |  |                                                                                             |
|---------------------------------------------|--|--------------------------------------------------------------------------------------------------------------------------------------------------------------------------------------------------------------------------------------------------------------------------------------------------------------------------------------------------------------------------------------------------------------------------------------------------------------------------------------------------------------------------------------------------------------------------------------------------------------------------------------------------------------------------------------------------------------------------------------------------------------------------------------------------------------------------------------------------------------------------------------------------------------------------------------------------------------------------------------------|--|---------------------------------------------------------------------------------------------|
|                                             |  | <p>Use:</p> <p><input type="checkbox"/> commercial    <input type="checkbox"/> housing</p> <p><input type="checkbox"/> not in use</p> <p><input type="checkbox"/> under construction/restoration</p> <p><input type="checkbox"/> Other _____</p> <p>Technological systems pertaining to unit:</p> <p><input type="checkbox"/> plumbing system</p> <p><input type="checkbox"/> electrical system</p> <p><input type="checkbox"/> heating system</p> <p><input type="checkbox"/> upper floors</p> <p>Use:</p> <p><input type="checkbox"/> commercial    <input type="checkbox"/> housing</p> <p><input type="checkbox"/> mansard</p> <p><input type="checkbox"/> not in use</p> <p><input type="checkbox"/> under construction/restoration</p> <p><input type="checkbox"/> Other _____</p> <p>Technological systems pertaining to unit:</p> <p><input type="checkbox"/> plumbing system</p> <p><input type="checkbox"/> electrical system</p> <p><input type="checkbox"/> heating system</p> |  |                                                                                             |
| <p>Maximum water depth inside buildings</p> |  | <p>Basement                  cm</p> <p>Ground floor              cm</p> <p>Upper floors               cm</p>                                                                                                                                                                                                                                                                                                                                                                                                                                                                                                                                                                                                                                                                                                                                                                                                                                                                               |  | <p>Data refer to maximum water depth inside the building, during the whole flood event.</p> |

DAMAGE TO STRUCTURE – Concrete/Steel buildings

|                    |                                                          |                                                                                                                                                                                                                                                                                                                                                                                                |         |          |               |        |         |               |             |         |      |                                                                                                                                                                                                                                                                                                                                                                                                                                                                                                                                                                                            |  |
|--------------------|----------------------------------------------------------|------------------------------------------------------------------------------------------------------------------------------------------------------------------------------------------------------------------------------------------------------------------------------------------------------------------------------------------------------------------------------------------------|---------|----------|---------------|--------|---------|---------------|-------------|---------|------|--------------------------------------------------------------------------------------------------------------------------------------------------------------------------------------------------------------------------------------------------------------------------------------------------------------------------------------------------------------------------------------------------------------------------------------------------------------------------------------------------------------------------------------------------------------------------------------------|--|
| Structural damage  | <input type="checkbox"/> Yes <input type="checkbox"/> No |                                                                                                                                                                                                                                                                                                                                                                                                |         |          |               |        |         |               |             |         |      | Specify, for each degree of damage severity, the portion of the affected elements with respect to the total elements in the unit.<br><br>Damage is to be considered “light” when the strength of the element is not compromised, there is no danger for occupants because of collapse /fallen objects<br><br>Damage is to be considered “medium” when the strength of the element could be compromised, leading to its collapse. Falling objects are possible.<br><br>Damage is to be considered “severe” when the strength of the element is compromised and collapse occurred/is likely. |  |
|                    |                                                          | Light Damage                                                                                                                                                                                                                                                                                                                                                                                   |         |          | Medium Damage |        |         | Severe Damage |             |         |      |                                                                                                                                                                                                                                                                                                                                                                                                                                                                                                                                                                                            |  |
| Causes of collapse |                                                          | Evidence of:<br><br><input type="checkbox"/> collapse of external cladding<br>Cladding without damage to structural elements<br><br><input type="checkbox"/> severe damage to structural elements (pillars and girders) without building collapse<br><br><input type="checkbox"/> severe damage/collapse to/of building structure<br><br><input type="checkbox"/> severe damage to foundations | <1/3    | 1/3-2/3  | >2/3          | <1/3   | 1/3-2/3 | >2/3          | <1/3        | 1/3-2/3 | >2/3 |                                                                                                                                                                                                                                                                                                                                                                                                                                                                                                                                                                                            |  |
|                    |                                                          |                                                                                                                                                                                                                                                                                                                                                                                                | Pillars | Cladding | Floor         | Stairs | Roof    | Partitions    | Foundations |         |      |                                                                                                                                                                                                                                                                                                                                                                                                                                                                                                                                                                                            |  |

|  |  |                                                                                                                                                                                                                      |  |  |
|--|--|----------------------------------------------------------------------------------------------------------------------------------------------------------------------------------------------------------------------|--|--|
|  |  | without building collapse<br><br><input type="checkbox"/> severe damage to foundations and building collapse<br><br><input type="checkbox"/> building displacement<br><br><input type="checkbox"/> building rotation |  |  |
|--|--|----------------------------------------------------------------------------------------------------------------------------------------------------------------------------------------------------------------------|--|--|

**DAMAGE TO STRUCTURE – Masonry/Wood buildings**

|                   |                                                          |              |         |      |               |         |      |               |         |      |
|-------------------|----------------------------------------------------------|--------------|---------|------|---------------|---------|------|---------------|---------|------|
| Structural damage | <input type="checkbox"/> Yes <input type="checkbox"/> No |              |         |      |               |         |      |               |         |      |
|                   |                                                          | Light Damage |         |      | Medium Damage |         |      | Severe Damage |         |      |
|                   |                                                          | <1/3         | 1/3-2/3 | >2/3 | <1/3          | 1/3-2/3 | >2/3 | <1/3          | 1/3-2/3 | >2/3 |
|                   | Vertical structures                                      |              |         |      |               |         |      |               |         |      |
|                   | Floors                                                   |              |         |      |               |         |      |               |         |      |
|                   | Stairs                                                   |              |         |      |               |         |      |               |         |      |
|                   | Roof                                                     |              |         |      |               |         |      |               |         |      |
|                   | Partitions                                               |              |         |      |               |         |      |               |         |      |
| Foundations       |                                                          |              |         |      |               |         |      |               |         |      |

Specify, for each degree of damage severity, the portion of affected elements with respect to total elements in the unit.

Damage is to be considered “light” when the strength of the element is not compromised, there is no danger for occupants because of collapse /fallen objects

Damage is to be considered “medium” when the strength of the element could be compromised, leading to its collapse. Falling objects are possible.

Damage is to be considered “severe” when the strength of the element is compromised and collapse occurred/is likely.

|                    |  |                                                                                                                                    |  |  |
|--------------------|--|------------------------------------------------------------------------------------------------------------------------------------|--|--|
| Causes of collapse |  | Evidence of:<br><br><input type="checkbox"/> severe damage/collapse of ground wall because of flood wave without building collapse |  |  |
|--------------------|--|------------------------------------------------------------------------------------------------------------------------------------|--|--|



|                                    |  |                                                                                                                                                                                                            |  |                                                                        |
|------------------------------------|--|------------------------------------------------------------------------------------------------------------------------------------------------------------------------------------------------------------|--|------------------------------------------------------------------------|
|                                    |  |                                                                                                                                                                                                            |  | incurred costs must be considered as "clean-up cost".                  |
|                                    |  | LLLLLLLLLLLLLLLL €                                                                                                                                                                                         |  | Specify the economic value of damage.                                  |
| Damage to technological systems    |  | <input type="checkbox"/> plumbing system<br><input type="checkbox"/> electrical system<br><input type="checkbox"/> heating system<br><input type="checkbox"/> lift<br><input type="checkbox"/> Other _____ |  |                                                                        |
|                                    |  | LLLLLLLLLLLLLLLL €                                                                                                                                                                                         |  | Specify the economic value of damage.                                  |
| <b>Damage to structure - Total</b> |  | LLLLLLLLLLLLLLLL €                                                                                                                                                                                         |  | Specify the economic value of damage, as the sum of previous headings. |
| <b>DAMAGE TO CONTENTS</b>          |  |                                                                                                                                                                                                            |  |                                                                        |
| Damage to furniture                |  | <input type="checkbox"/> Yes <input type="checkbox"/> No                                                                                                                                                   |  |                                                                        |
|                                    |  | LLLLLLLLLLLLLLLL €                                                                                                                                                                                         |  | Specify the economic value of damage.                                  |
| Damage to household appliances     |  | <input type="checkbox"/> Yes <input type="checkbox"/> No<br>Specify: _____<br>_____                                                                                                                        |  |                                                                        |
|                                    |  | LLLLLLLLLLLLLLLL €                                                                                                                                                                                         |  | Specify the economic value of damage.                                  |
| Other                              |  | Specify: _____<br>_____                                                                                                                                                                                    |  |                                                                        |

|                                       |  |                                                                                                                                                                        |              |                                                                                                                                                                     |
|---------------------------------------|--|------------------------------------------------------------------------------------------------------------------------------------------------------------------------|--------------|---------------------------------------------------------------------------------------------------------------------------------------------------------------------|
|                                       |  | LLLLLLLLL_ _ LLLLLL €                                                                                                                                                  |              | Specify the economic value of damage.                                                                                                                               |
| <b>Damage to contents - Total</b>     |  | LLLLLLLLL_ _ LLLLLL €                                                                                                                                                  |              | Specify the economic value of damage, as the sum of previous headings.                                                                                              |
| <b>Direct damage - Total</b>          |  | LLLLLLLLL_ _ LLLLLL €                                                                                                                                                  |              | Specify the economic value of damage, as the sum of previous headings.                                                                                              |
| <b>Section 5C- Indirect damage</b>    |  | <b>Data</b>                                                                                                                                                            | <b>Notes</b> | <b>Guidelines</b>                                                                                                                                                   |
| Lack of Usability                     |  | <input type="checkbox"/> Yes <input type="checkbox"/> No<br>Duration            L L L L days<br>Causes _____<br>_____                                                  |              |                                                                                                                                                                     |
| Clean-up costs                        |  | <input type="checkbox"/> Yes <input type="checkbox"/> No                                                                                                               |              | Clean-up costs relate, for example, to the following activities: cleaning, debris removal, clearing, etc.                                                           |
|                                       |  | <input type="checkbox"/> private work<br>LLLLLLLLL_ _ LLLLLL €<br>LLLLLLLLL_ _ L days/person<br><input type="checkbox"/> public work                                   |              | Indicate if clean-up was done by private citizens or local authorities. In the first case, please specify incurred costs or required job (in terms of days/person). |
| <b>Section 5D- Mitigation factors</b> |  | <b>Data</b>                                                                                                                                                            | <b>Notes</b> | <b>Guidelines</b>                                                                                                                                                   |
| Mitigation actions                    |  | <input type="checkbox"/> None<br><input type="checkbox"/> Suction pumps<br><input type="checkbox"/> Shields<br><input type="checkbox"/> Moving objects at upper floors |              |                                                                                                                                                                     |

|  |  |                                                                                                                                                                                                                                                                               |  |  |
|--|--|-------------------------------------------------------------------------------------------------------------------------------------------------------------------------------------------------------------------------------------------------------------------------------|--|--|
|  |  | <input type="checkbox"/> Power interruption / switching off<br><input type="checkbox"/> Evacuation<br><input type="checkbox"/> Other _____<br>Time:<br>Hour                     _ _   _ _ <br>Date                    _ _   _ _   _ _ <br>Motivation: _____<br>_____<br>_____ |  |  |
|--|--|-------------------------------------------------------------------------------------------------------------------------------------------------------------------------------------------------------------------------------------------------------------------------------|--|--|

**SECTION 6 – DAMAGE TO COMMON AREAS (To fill in only in the case of apartments house/semi-detached house)**

| Section 6A- Common areas features |  | Data                                                                                                                                                                   | Notes | Guidelines                                                                                                                                                                                                                                                        |
|-----------------------------------|--|------------------------------------------------------------------------------------------------------------------------------------------------------------------------|-------|-------------------------------------------------------------------------------------------------------------------------------------------------------------------------------------------------------------------------------------------------------------------|
| Presence of basement              |  | <input type="checkbox"/> No <input type="checkbox"/> Yes            _ _  N°<br><input type="checkbox"/> Basement windows<br>Surface            _ _ _ _  m <sup>2</sup> |       | <p>Indicate the number of storeys below the ground level and whether basement windows are present.</p> <p>Indicate the surface of every storey, common to all housing units. In the case of more than one storey, supply single floor information in “Notes”.</p> |
| Elevation of ground floor         |  | _ _ _  cm                                                                                                                                                              |       | Elevation of the ground floor with respect to the ground level, in front of the building. If ground level is irregular, please specify in “Notes”.                                                                                                                |
| Section 6B- Direct damage         |  | Data                                                                                                                                                                   | Notes | Guidelines                                                                                                                                                                                                                                                        |
| Flooded storeys                   |  | <input type="checkbox"/> Basement<br>Use:<br><input type="checkbox"/> box <input type="checkbox"/> cellar<br><input type="checkbox"/> not in use                       |       | <p>Indicate which storeys were flooded and their use.</p> <p>Indicate whether technological systems are present, for every storey.</p>                                                                                                                            |

|  |  |                                                                                                                                                                                                                                                                                                                                                                                                                                                                                                                                                                                                                                                                                                                                                                                                                                                                                                                                                                                                                               |  |  |
|--|--|-------------------------------------------------------------------------------------------------------------------------------------------------------------------------------------------------------------------------------------------------------------------------------------------------------------------------------------------------------------------------------------------------------------------------------------------------------------------------------------------------------------------------------------------------------------------------------------------------------------------------------------------------------------------------------------------------------------------------------------------------------------------------------------------------------------------------------------------------------------------------------------------------------------------------------------------------------------------------------------------------------------------------------|--|--|
|  |  | <input type="checkbox"/> under construction/restoration<br><input type="checkbox"/> Other _____<br>Technological systems common to all units:<br><input type="checkbox"/> plumbing system<br><input type="checkbox"/> electrical system<br><input type="checkbox"/> heating system<br><input type="checkbox"/> Ground floor<br>Use:<br><input type="checkbox"/> porter's lodge/lobby<br><input type="checkbox"/> not in use<br><input type="checkbox"/> under construction/restoration<br><input type="checkbox"/> Other _____<br>Technological systems common to all units:<br><input type="checkbox"/> plumbing system<br><input type="checkbox"/> electrical system<br><input type="checkbox"/> heating system<br><input type="checkbox"/> upper floors<br>Use:<br><input type="checkbox"/> lobby <input type="checkbox"/> mansard<br><input type="checkbox"/> not in use<br><input type="checkbox"/> under construction/restoration<br><input type="checkbox"/> Other _____<br>Technological systems common to all units: |  |  |
|--|--|-------------------------------------------------------------------------------------------------------------------------------------------------------------------------------------------------------------------------------------------------------------------------------------------------------------------------------------------------------------------------------------------------------------------------------------------------------------------------------------------------------------------------------------------------------------------------------------------------------------------------------------------------------------------------------------------------------------------------------------------------------------------------------------------------------------------------------------------------------------------------------------------------------------------------------------------------------------------------------------------------------------------------------|--|--|



|                                      |  |                                                                                                                                   |                                                                                      |
|--------------------------------------|--|-----------------------------------------------------------------------------------------------------------------------------------|--------------------------------------------------------------------------------------|
|                                      |  | <input type="checkbox"/> plumbing system<br><input type="checkbox"/> electrical system<br><input type="checkbox"/> heating system |                                                                                      |
| Maximum water depth inside buildings |  | Basement            L L L   cm<br>Ground floor       L L L   cm<br>Upper floors        L L L   cm                                 | Data refer to maximum water depth inside the building, during the whole flood event. |

**DAMAGE TO STRUCTURE – Concrete/Steel buildings**

|                                                                                                                                                                                                                                                                                                                                                                                                                                                                                                                                                                                           |                                                                                                              |              |         |      |               |         |      |               |         |      |
|-------------------------------------------------------------------------------------------------------------------------------------------------------------------------------------------------------------------------------------------------------------------------------------------------------------------------------------------------------------------------------------------------------------------------------------------------------------------------------------------------------------------------------------------------------------------------------------------|--------------------------------------------------------------------------------------------------------------|--------------|---------|------|---------------|---------|------|---------------|---------|------|
| Structural damage                                                                                                                                                                                                                                                                                                                                                                                                                                                                                                                                                                         | <input type="checkbox"/> Yes <input type="checkbox"/> No                                                     |              |         |      |               |         |      |               |         |      |
|                                                                                                                                                                                                                                                                                                                                                                                                                                                                                                                                                                                           |                                                                                                              | Light Damage |         |      | Medium Damage |         |      | Severe Damage |         |      |
|                                                                                                                                                                                                                                                                                                                                                                                                                                                                                                                                                                                           |                                                                                                              | <1/3         | 1/3-2/3 | >2/3 | <1/3          | 1/3-2/3 | >2/3 | <1/3          | 1/3-2/3 | >2/3 |
|                                                                                                                                                                                                                                                                                                                                                                                                                                                                                                                                                                                           | Pillars                                                                                                      |              |         |      |               |         |      |               |         |      |
|                                                                                                                                                                                                                                                                                                                                                                                                                                                                                                                                                                                           | Cladding                                                                                                     |              |         |      |               |         |      |               |         |      |
|                                                                                                                                                                                                                                                                                                                                                                                                                                                                                                                                                                                           | Floor                                                                                                        |              |         |      |               |         |      |               |         |      |
|                                                                                                                                                                                                                                                                                                                                                                                                                                                                                                                                                                                           | Stairs                                                                                                       |              |         |      |               |         |      |               |         |      |
|                                                                                                                                                                                                                                                                                                                                                                                                                                                                                                                                                                                           | Roof                                                                                                         |              |         |      |               |         |      |               |         |      |
|                                                                                                                                                                                                                                                                                                                                                                                                                                                                                                                                                                                           | Partitions                                                                                                   |              |         |      |               |         |      |               |         |      |
| Foundations                                                                                                                                                                                                                                                                                                                                                                                                                                                                                                                                                                               |                                                                                                              |              |         |      |               |         |      |               |         |      |
| Causes of collapse                                                                                                                                                                                                                                                                                                                                                                                                                                                                                                                                                                        | Evidence of:<br><input type="checkbox"/> collapse of external cladding without damage to structural elements |              |         |      |               |         |      |               |         |      |
| Specify, for each degree of damage severity, the portion of affected elements with respect to total elements in the common area.<br><br>Damage is to be considered “light” when the strength of the element is not compromised, there is no danger for occupants because of collapse /fallen objects<br><br>Damage is to be considered “medium” when the strength of the element could be compromised, leading to its collapse. Falling objects are possible.<br><br>Damage is to be considered “severe” when the strength of the element is compromised and collapse occurred/is likely. |                                                                                                              |              |         |      |               |         |      |               |         |      |

|  |  |                                                                                                                                                                                                                                                                                                                                                                                                                                                                                 |  |  |
|--|--|---------------------------------------------------------------------------------------------------------------------------------------------------------------------------------------------------------------------------------------------------------------------------------------------------------------------------------------------------------------------------------------------------------------------------------------------------------------------------------|--|--|
|  |  | <input type="checkbox"/> severe damage to structural elements (pillars and girders) without building collapse<br><br><input type="checkbox"/> severe damage/collapse to/of building structure<br><br><input type="checkbox"/> severe damage to foundations without building collapse<br><br><input type="checkbox"/> severe damage to foundations and building collapse<br><br><input type="checkbox"/> building displacement<br><br><input type="checkbox"/> building rotation |  |  |
|--|--|---------------------------------------------------------------------------------------------------------------------------------------------------------------------------------------------------------------------------------------------------------------------------------------------------------------------------------------------------------------------------------------------------------------------------------------------------------------------------------|--|--|

**DAMAGE TO STRUCTURE – Masonry/Wood buildings**

|                   |                                                          |              |         |      |               |         |      |               |         |      |                                                                                                                                                                                                                                                                                                                                                                                                                                                                                                                                                                                           |
|-------------------|----------------------------------------------------------|--------------|---------|------|---------------|---------|------|---------------|---------|------|-------------------------------------------------------------------------------------------------------------------------------------------------------------------------------------------------------------------------------------------------------------------------------------------------------------------------------------------------------------------------------------------------------------------------------------------------------------------------------------------------------------------------------------------------------------------------------------------|
| Structural damage | <input type="checkbox"/> Yes <input type="checkbox"/> No |              |         |      |               |         |      |               |         |      | Specify, for each degree of damage severity, the portion of affected elements with respect to total elements in the common area.<br><br>Damage is to be considered “light” when the strength of the element is not compromised, there is no danger for occupants because of collapse /fallen objects<br><br>Damage is to be considered “medium” when the strength of the element could be compromised, leading to its collapse. Falling objects are possible.<br><br>Damage is to be considered “severe” when the strength of the element is compromised and collapse occurred/is likely. |
|                   |                                                          | Light Damage |         |      | Medium Damage |         |      | Severe Damage |         |      |                                                                                                                                                                                                                                                                                                                                                                                                                                                                                                                                                                                           |
|                   |                                                          | <1/3         | 1/3-2/3 | >2/3 | <1/3          | 1/3-2/3 | >2/3 | <1/3          | 1/3-2/3 | >2/3 |                                                                                                                                                                                                                                                                                                                                                                                                                                                                                                                                                                                           |
|                   | Vertical structures                                      |              |         |      |               |         |      |               |         |      |                                                                                                                                                                                                                                                                                                                                                                                                                                                                                                                                                                                           |
|                   | Floors                                                   |              |         |      |               |         |      |               |         |      |                                                                                                                                                                                                                                                                                                                                                                                                                                                                                                                                                                                           |
|                   | Stairs                                                   |              |         |      |               |         |      |               |         |      |                                                                                                                                                                                                                                                                                                                                                                                                                                                                                                                                                                                           |
|                   | Roof                                                     |              |         |      |               |         |      |               |         |      |                                                                                                                                                                                                                                                                                                                                                                                                                                                                                                                                                                                           |
|                   | Partitions                                               |              |         |      |               |         |      |               |         |      |                                                                                                                                                                                                                                                                                                                                                                                                                                                                                                                                                                                           |
| Foundations       |                                                          |              |         |      |               |         |      |               |         |      |                                                                                                                                                                                                                                                                                                                                                                                                                                                                                                                                                                                           |

|                             |  |                                                                                                                                                                                                                                                                                                                                                                                                                                                                                                                                                           |  |                                                                                                                                       |
|-----------------------------|--|-----------------------------------------------------------------------------------------------------------------------------------------------------------------------------------------------------------------------------------------------------------------------------------------------------------------------------------------------------------------------------------------------------------------------------------------------------------------------------------------------------------------------------------------------------------|--|---------------------------------------------------------------------------------------------------------------------------------------|
| Causes of collapse          |  | Evidence of: <ul style="list-style-type: none"> <li><input type="checkbox"/> severe damage/collapse of ground wall because of flood wave without building collapse</li> <li><input type="checkbox"/> severe damage/collapse to/of building structure</li> <li><input type="checkbox"/> severe damage to foundations without building collapse</li> <li><input type="checkbox"/> severe damage to foundations and building collapse</li> <li><input type="checkbox"/> building displacement</li> <li><input type="checkbox"/> building rotation</li> </ul> |  |                                                                                                                                       |
|                             |  | _ _ _ _ _ _ _ _ _ _ _ _ _ _  €                                                                                                                                                                                                                                                                                                                                                                                                                                                                                                                            |  | Specify the economic value of damage.                                                                                                 |
| Damage to coating/plaster   |  | <input type="checkbox"/> Yes <input type="checkbox"/> No<br> _ _ _ _  damaged surface [m <sup>2</sup> ]                                                                                                                                                                                                                                                                                                                                                                                                                                                   |  |                                                                                                                                       |
|                             |  | _ _ _ _ _ _ _ _ _ _ _ _ _ _  €                                                                                                                                                                                                                                                                                                                                                                                                                                                                                                                            |  | Specify the economic value of damage.                                                                                                 |
| Damage to doors and windows |  | <input type="checkbox"/> Yes <input type="checkbox"/> No<br>N° of damaged doors  _ _ <br> _ _ _ _  damaged surface [m <sup>2</sup> ]<br>N° of damaged windows  _ _ <br> _ _ _ _  damaged surface [m <sup>2</sup> ]                                                                                                                                                                                                                                                                                                                                        |  | Windows/doors are “damaged” if they need to be fixed/replaced. On the contrary, incurred costs must be considered as “clean-up cost”. |

|                                    |  |                                                                                                                                                                                                            |  |                                                                                                                                   |
|------------------------------------|--|------------------------------------------------------------------------------------------------------------------------------------------------------------------------------------------------------------|--|-----------------------------------------------------------------------------------------------------------------------------------|
|                                    |  | <p>LLLLLLLLLLLLLLLL €</p>                                                                                                                                                                                  |  | Specify the economic value of damage.                                                                                             |
| Damage to floors                   |  | <input type="checkbox"/> Yes <input type="checkbox"/> No<br>L L L L L damaged surface [m <sup>2</sup> ]                                                                                                    |  | Pavements are “damaged” if they need to be fixed/replaced. On the contrary, incurred costs must be considered as “clean-up cost”. |
|                                    |  | <p>LLLLLLLLLLLLLLLL €</p>                                                                                                                                                                                  |  | Specify the economic value of damage.                                                                                             |
| Damage to technological systems    |  | <input type="checkbox"/> plumbing system<br><input type="checkbox"/> electrical system<br><input type="checkbox"/> heating system<br><input type="checkbox"/> lift<br><input type="checkbox"/> Other _____ |  |                                                                                                                                   |
|                                    |  | <p>LLLLLLLLLLLLLLLL €</p>                                                                                                                                                                                  |  | Specify the economic value of damage.                                                                                             |
| <b>Damage to structure - Total</b> |  | <p>LLLLLLLLLLLLLLLL €</p>                                                                                                                                                                                  |  | Specify the economic value of damage, as the sum of previous headings.                                                            |
| <b>DAMAGE TO CONTENTS</b>          |  |                                                                                                                                                                                                            |  |                                                                                                                                   |
| Damage to furniture                |  | <input type="checkbox"/> Yes <input type="checkbox"/> No                                                                                                                                                   |  |                                                                                                                                   |
|                                    |  | <p>LLLLLLLLLLLLLLLL €</p>                                                                                                                                                                                  |  | Specify the economic value of damage.                                                                                             |
| Other                              |  | Specify: _____<br>_____                                                                                                                                                                                    |  |                                                                                                                                   |
|                                    |  | <p>LLLLLLLLLLLLLLLL €</p>                                                                                                                                                                                  |  | Specify the economic value of damage.                                                                                             |

|                                       |  |                                                                                                                                                                                                                                                                                      |              |                                                                                                                                                                     |
|---------------------------------------|--|--------------------------------------------------------------------------------------------------------------------------------------------------------------------------------------------------------------------------------------------------------------------------------------|--------------|---------------------------------------------------------------------------------------------------------------------------------------------------------------------|
| <b>Damage to contents - Total</b>     |  | LLLLLLLLLLLLLLLL €                                                                                                                                                                                                                                                                   |              | Specify the economic value of damage, as the sum of previous headings.                                                                                              |
| <b>Direct damage - Total</b>          |  | LLLLLLLLLLLLLLLL €                                                                                                                                                                                                                                                                   |              | Specify the economic value of damage, as the sum of previous headings.                                                                                              |
| <b>Section 6C- Indirect damage</b>    |  | <b>Data</b>                                                                                                                                                                                                                                                                          | <b>Notes</b> | <b>Guidelines</b>                                                                                                                                                   |
| Lack of Usability                     |  | <input type="checkbox"/> Yes <input type="checkbox"/> No<br>Duration              LLLLLL days<br>Causes _____<br>_____                                                                                                                                                               |              |                                                                                                                                                                     |
| Clean-up costs                        |  | <input type="checkbox"/> Yes <input type="checkbox"/> No                                                                                                                                                                                                                             |              | Clean-up costs relate, for example, to the following activities: cleaning, debris removal, clearing, etc.                                                           |
|                                       |  | <input type="checkbox"/> private work<br><br>LLLLLLLLLLLLLLLL €<br><br>LLLLLLLLLLLLL days/person<br><br><input type="checkbox"/> public work                                                                                                                                         |              | Indicate if clean-up was done by private citizens or local authorities. In the first case, please specify incurred costs or required job (in terms of days/person). |
| <b>Section 6D- Mitigation factors</b> |  | <b>Data</b>                                                                                                                                                                                                                                                                          | <b>Notes</b> | <b>Guidelines</b>                                                                                                                                                   |
| Mitigation actions                    |  | <input type="checkbox"/> None<br><input type="checkbox"/> Suction pumps<br><input type="checkbox"/> Retaining walls<br><input type="checkbox"/> Moving objects at upper floors<br><input type="checkbox"/> Power interruption / switching off<br><input type="checkbox"/> Evacuation |              |                                                                                                                                                                     |

|  |  |                                                                                                                                                                     |  |  |
|--|--|---------------------------------------------------------------------------------------------------------------------------------------------------------------------|--|--|
|  |  | <input type="checkbox"/> Other _____<br>Time:<br>Hour                     __   __ <br>Date                     __   __   __ <br>Motivation: _____<br>_____<br>_____ |  |  |
|--|--|---------------------------------------------------------------------------------------------------------------------------------------------------------------------|--|--|

**SECTION 7 – DAMAGE TO ATTACHED BUILDINGS (TO REPEAT FOR ANY ATTACHED BUILDNG)**

| Section 7A- features of attached building |                                                                                                                                                                   | Data                                                                                                                                                                                                                                              | Notes | Guidelines                                                                                                                                                      |
|-------------------------------------------|-------------------------------------------------------------------------------------------------------------------------------------------------------------------|---------------------------------------------------------------------------------------------------------------------------------------------------------------------------------------------------------------------------------------------------|-------|-----------------------------------------------------------------------------------------------------------------------------------------------------------------|
| Owner                                     | Name: _____<br>Surname: _____<br>Place of birth: _____<br>Date of birth:  _ _   _ _   _ _ <br>Address: _____<br>_____<br><input type="checkbox"/> Common property | <input type="checkbox"/> Confirmed<br><input type="checkbox"/> Not Confirmed<br>Name: _____<br>Surname: _____<br>Place of birth: _____<br>Date of birth:  _ _   _ _   _ _ <br>Address: _____<br>_____<br><input type="checkbox"/> Common property |       | When data are not confirmed, update the information.<br><br>In the case of more than one owner, please specify it in “notes” along with data of further owners. |
| Cadastral coordinates                     | Sub-Particle  _ _ _                                                                                                                                               |                                                                                                                                                                                                                                                   |       |                                                                                                                                                                 |
| Surface                                   |                                                                                                                                                                   | _ _ _ _  m <sup>2</sup>                                                                                                                                                                                                                           |       |                                                                                                                                                                 |
| Number of storeys (excepting basement)    |                                                                                                                                                                   | _ _  N°                                                                                                                                                                                                                                           |       | Indicate the number of storeys, excluding basement.                                                                                                             |

|                                  |  |                                                                                                                                                                                                                                                                                                                                                                                                                                                                                                                                                                                                                                                                         |              |                                                                                                                                                                                                                                                                  |
|----------------------------------|--|-------------------------------------------------------------------------------------------------------------------------------------------------------------------------------------------------------------------------------------------------------------------------------------------------------------------------------------------------------------------------------------------------------------------------------------------------------------------------------------------------------------------------------------------------------------------------------------------------------------------------------------------------------------------------|--------------|------------------------------------------------------------------------------------------------------------------------------------------------------------------------------------------------------------------------------------------------------------------|
| Presence of basement             |  | <input type="checkbox"/> No <input type="checkbox"/> Yes       _ _  N°<br><input type="checkbox"/> Basement windows<br>Surface       _ _ _ _  m <sup>2</sup>                                                                                                                                                                                                                                                                                                                                                                                                                                                                                                            |              | <p>Indicate the number of storeys below the ground level and whether basement windows are present.</p> <p>Indicate the surface of every storey, pertaining to the building. In the case of more than one storey, supply single floor information in "Notes".</p> |
| Elevation of ground floor        |  | _ _ _  cm                                                                                                                                                                                                                                                                                                                                                                                                                                                                                                                                                                                                                                                               |              | <p>Elevation of the ground floor with respect to the ground level, in front of the building. If ground level is irregular, please specify it in "Notes".</p>                                                                                                     |
| <b>Section 7B- Direct damage</b> |  | <b>Data</b>                                                                                                                                                                                                                                                                                                                                                                                                                                                                                                                                                                                                                                                             | <b>Notes</b> | <b>Guidelines</b>                                                                                                                                                                                                                                                |
| Flooded storeys                  |  | <input type="checkbox"/> Basement<br>Use:<br><input type="checkbox"/> box <input type="checkbox"/> storage<br><input type="checkbox"/> poultry house/stable<br><input type="checkbox"/> not in use<br><input type="checkbox"/> under construction/restoration<br><input type="checkbox"/> Other _____<br>Technological systems pertaining to attached building:<br><input type="checkbox"/> plumbing system<br><input type="checkbox"/> electrical system<br><input type="checkbox"/> heating system<br><input type="checkbox"/> Ground floor<br>Use:<br><input type="checkbox"/> box <input type="checkbox"/> storage<br><input type="checkbox"/> poultry house/stable |              | <p>Indicate which storeys were flooded and their use.</p> <p>Indicate whether technological systems are present, for every storey.</p>                                                                                                                           |

|                                                |  |                                                                                                                                                                                                                                                                                                                                                                                                                                                                                                                                                                                                                                                                                                                                                                                                                   |  |                                                                                      |
|------------------------------------------------|--|-------------------------------------------------------------------------------------------------------------------------------------------------------------------------------------------------------------------------------------------------------------------------------------------------------------------------------------------------------------------------------------------------------------------------------------------------------------------------------------------------------------------------------------------------------------------------------------------------------------------------------------------------------------------------------------------------------------------------------------------------------------------------------------------------------------------|--|--------------------------------------------------------------------------------------|
|                                                |  | <input type="checkbox"/> not in use<br><input type="checkbox"/> under construction/restoration<br><input type="checkbox"/> Other _____<br>Technological systems pertaining to attached building:<br><input type="checkbox"/> plumbing system<br><input type="checkbox"/> electrical system<br><input type="checkbox"/> heating system<br><input type="checkbox"/> upper floors<br>Use:<br><input type="checkbox"/> storage <input type="checkbox"/> poultry house/stable<br><input type="checkbox"/> not in use<br><input type="checkbox"/> under construction/restoration<br><input type="checkbox"/> Other _____<br>Technological systems pertaining to attached building:<br><input type="checkbox"/> plumbing system<br><input type="checkbox"/> electrical system<br><input type="checkbox"/> heating system |  |                                                                                      |
| Maximum water depth inside buildings           |  | Basement            _ _  cm<br>Ground floor        _ _  cm<br>Upper floors        _ _  cm                                                                                                                                                                                                                                                                                                                                                                                                                                                                                                                                                                                                                                                                                                                         |  | Data refer to maximum water depth inside the building, during the whole flood event. |
| DAMAGE TO STRUCTURE – Concrete/Steel buildings |  |                                                                                                                                                                                                                                                                                                                                                                                                                                                                                                                                                                                                                                                                                                                                                                                                                   |  |                                                                                      |



| <p>Structural damage</p>  | <p><input type="checkbox"/> Yes      <input type="checkbox"/> No</p> <table border="1"> <thead> <tr> <th></th> <th colspan="3">Light Damage</th> <th colspan="3">Medium Damage</th> <th colspan="3">Severe Damage</th> </tr> <tr> <th></th> <th>&lt;1/3</th> <th>1/3-2/3</th> <th>&gt;2/3</th> <th>&lt;1/3</th> <th>1/3-2/3</th> <th>&gt;2/3</th> <th>&lt;1/3</th> <th>1/3-2/3</th> <th>&gt;2/3</th> </tr> </thead> <tbody> <tr> <td>Pillars</td> <td></td><td></td><td></td><td></td><td></td><td></td><td></td><td></td><td></td> </tr> <tr> <td>Cladding</td> <td></td><td></td><td></td><td></td><td></td><td></td><td></td><td></td><td></td> </tr> <tr> <td>Floor</td> <td></td><td></td><td></td><td></td><td></td><td></td><td></td><td></td><td></td> </tr> <tr> <td>Stairs</td> <td></td><td></td><td></td><td></td><td></td><td></td><td></td><td></td><td></td> </tr> <tr> <td>Roof</td> <td></td><td></td><td></td><td></td><td></td><td></td><td></td><td></td><td></td> </tr> <tr> <td>Partitions</td> <td></td><td></td><td></td><td></td><td></td><td></td><td></td><td></td><td></td> </tr> <tr> <td>Foundatiosn</td> <td></td><td></td><td></td><td></td><td></td><td></td><td></td><td></td><td></td> </tr> </tbody> </table> |         | Light Damage |               |         | Medium Damage |               |         | Severe Damage |  |  |  | <1/3 | 1/3-2/3 | >2/3 | <1/3 | 1/3-2/3 | >2/3 | <1/3 | 1/3-2/3 | >2/3 | Pillars |  |  |  |  |  |  |  |  |  | Cladding |  |  |  |  |  |  |  |  |  | Floor |  |  |  |  |  |  |  |  |  | Stairs |  |  |  |  |  |  |  |  |  | Roof |  |  |  |  |  |  |  |  |  | Partitions |  |  |  |  |  |  |  |  |  | Foundatiosn |  |  |  |  |  |  |  |  |  |  | <p>Specify, for each degree of damage severity, the portion of affected elements with respect to total elements in the building.</p> <p>Damage is to be considered “light” when the strength of the element is not compromised, there is no danger for occupants because of collapse /fallen objects</p> <p>Damage is to be considered “medium” when the strength of the element could be compromised, leading to its collapse. Falling objects are possible.</p> <p>Damage is to be considered “severe” when the strength of the element is compromised and collapse occurred/is likely.</p> |
|---------------------------|---------------------------------------------------------------------------------------------------------------------------------------------------------------------------------------------------------------------------------------------------------------------------------------------------------------------------------------------------------------------------------------------------------------------------------------------------------------------------------------------------------------------------------------------------------------------------------------------------------------------------------------------------------------------------------------------------------------------------------------------------------------------------------------------------------------------------------------------------------------------------------------------------------------------------------------------------------------------------------------------------------------------------------------------------------------------------------------------------------------------------------------------------------------------------------------------------------------------------------------------------|---------|--------------|---------------|---------|---------------|---------------|---------|---------------|--|--|--|------|---------|------|------|---------|------|------|---------|------|---------|--|--|--|--|--|--|--|--|--|----------|--|--|--|--|--|--|--|--|--|-------|--|--|--|--|--|--|--|--|--|--------|--|--|--|--|--|--|--|--|--|------|--|--|--|--|--|--|--|--|--|------------|--|--|--|--|--|--|--|--|--|-------------|--|--|--|--|--|--|--|--|--|--|-----------------------------------------------------------------------------------------------------------------------------------------------------------------------------------------------------------------------------------------------------------------------------------------------------------------------------------------------------------------------------------------------------------------------------------------------------------------------------------------------------------------------------------------------------------------------------------------------|
|                           | Light Damage                                                                                                                                                                                                                                                                                                                                                                                                                                                                                                                                                                                                                                                                                                                                                                                                                                                                                                                                                                                                                                                                                                                                                                                                                                      |         |              | Medium Damage |         |               | Severe Damage |         |               |  |  |  |      |         |      |      |         |      |      |         |      |         |  |  |  |  |  |  |  |  |  |          |  |  |  |  |  |  |  |  |  |       |  |  |  |  |  |  |  |  |  |        |  |  |  |  |  |  |  |  |  |      |  |  |  |  |  |  |  |  |  |            |  |  |  |  |  |  |  |  |  |             |  |  |  |  |  |  |  |  |  |  |                                                                                                                                                                                                                                                                                                                                                                                                                                                                                                                                                                                               |
|                           | <1/3                                                                                                                                                                                                                                                                                                                                                                                                                                                                                                                                                                                                                                                                                                                                                                                                                                                                                                                                                                                                                                                                                                                                                                                                                                              | 1/3-2/3 | >2/3         | <1/3          | 1/3-2/3 | >2/3          | <1/3          | 1/3-2/3 | >2/3          |  |  |  |      |         |      |      |         |      |      |         |      |         |  |  |  |  |  |  |  |  |  |          |  |  |  |  |  |  |  |  |  |       |  |  |  |  |  |  |  |  |  |        |  |  |  |  |  |  |  |  |  |      |  |  |  |  |  |  |  |  |  |            |  |  |  |  |  |  |  |  |  |             |  |  |  |  |  |  |  |  |  |  |                                                                                                                                                                                                                                                                                                                                                                                                                                                                                                                                                                                               |
| Pillars                   |                                                                                                                                                                                                                                                                                                                                                                                                                                                                                                                                                                                                                                                                                                                                                                                                                                                                                                                                                                                                                                                                                                                                                                                                                                                   |         |              |               |         |               |               |         |               |  |  |  |      |         |      |      |         |      |      |         |      |         |  |  |  |  |  |  |  |  |  |          |  |  |  |  |  |  |  |  |  |       |  |  |  |  |  |  |  |  |  |        |  |  |  |  |  |  |  |  |  |      |  |  |  |  |  |  |  |  |  |            |  |  |  |  |  |  |  |  |  |             |  |  |  |  |  |  |  |  |  |  |                                                                                                                                                                                                                                                                                                                                                                                                                                                                                                                                                                                               |
| Cladding                  |                                                                                                                                                                                                                                                                                                                                                                                                                                                                                                                                                                                                                                                                                                                                                                                                                                                                                                                                                                                                                                                                                                                                                                                                                                                   |         |              |               |         |               |               |         |               |  |  |  |      |         |      |      |         |      |      |         |      |         |  |  |  |  |  |  |  |  |  |          |  |  |  |  |  |  |  |  |  |       |  |  |  |  |  |  |  |  |  |        |  |  |  |  |  |  |  |  |  |      |  |  |  |  |  |  |  |  |  |            |  |  |  |  |  |  |  |  |  |             |  |  |  |  |  |  |  |  |  |  |                                                                                                                                                                                                                                                                                                                                                                                                                                                                                                                                                                                               |
| Floor                     |                                                                                                                                                                                                                                                                                                                                                                                                                                                                                                                                                                                                                                                                                                                                                                                                                                                                                                                                                                                                                                                                                                                                                                                                                                                   |         |              |               |         |               |               |         |               |  |  |  |      |         |      |      |         |      |      |         |      |         |  |  |  |  |  |  |  |  |  |          |  |  |  |  |  |  |  |  |  |       |  |  |  |  |  |  |  |  |  |        |  |  |  |  |  |  |  |  |  |      |  |  |  |  |  |  |  |  |  |            |  |  |  |  |  |  |  |  |  |             |  |  |  |  |  |  |  |  |  |  |                                                                                                                                                                                                                                                                                                                                                                                                                                                                                                                                                                                               |
| Stairs                    |                                                                                                                                                                                                                                                                                                                                                                                                                                                                                                                                                                                                                                                                                                                                                                                                                                                                                                                                                                                                                                                                                                                                                                                                                                                   |         |              |               |         |               |               |         |               |  |  |  |      |         |      |      |         |      |      |         |      |         |  |  |  |  |  |  |  |  |  |          |  |  |  |  |  |  |  |  |  |       |  |  |  |  |  |  |  |  |  |        |  |  |  |  |  |  |  |  |  |      |  |  |  |  |  |  |  |  |  |            |  |  |  |  |  |  |  |  |  |             |  |  |  |  |  |  |  |  |  |  |                                                                                                                                                                                                                                                                                                                                                                                                                                                                                                                                                                                               |
| Roof                      |                                                                                                                                                                                                                                                                                                                                                                                                                                                                                                                                                                                                                                                                                                                                                                                                                                                                                                                                                                                                                                                                                                                                                                                                                                                   |         |              |               |         |               |               |         |               |  |  |  |      |         |      |      |         |      |      |         |      |         |  |  |  |  |  |  |  |  |  |          |  |  |  |  |  |  |  |  |  |       |  |  |  |  |  |  |  |  |  |        |  |  |  |  |  |  |  |  |  |      |  |  |  |  |  |  |  |  |  |            |  |  |  |  |  |  |  |  |  |             |  |  |  |  |  |  |  |  |  |  |                                                                                                                                                                                                                                                                                                                                                                                                                                                                                                                                                                                               |
| Partitions                |                                                                                                                                                                                                                                                                                                                                                                                                                                                                                                                                                                                                                                                                                                                                                                                                                                                                                                                                                                                                                                                                                                                                                                                                                                                   |         |              |               |         |               |               |         |               |  |  |  |      |         |      |      |         |      |      |         |      |         |  |  |  |  |  |  |  |  |  |          |  |  |  |  |  |  |  |  |  |       |  |  |  |  |  |  |  |  |  |        |  |  |  |  |  |  |  |  |  |      |  |  |  |  |  |  |  |  |  |            |  |  |  |  |  |  |  |  |  |             |  |  |  |  |  |  |  |  |  |  |                                                                                                                                                                                                                                                                                                                                                                                                                                                                                                                                                                                               |
| Foundatiosn               |                                                                                                                                                                                                                                                                                                                                                                                                                                                                                                                                                                                                                                                                                                                                                                                                                                                                                                                                                                                                                                                                                                                                                                                                                                                   |         |              |               |         |               |               |         |               |  |  |  |      |         |      |      |         |      |      |         |      |         |  |  |  |  |  |  |  |  |  |          |  |  |  |  |  |  |  |  |  |       |  |  |  |  |  |  |  |  |  |        |  |  |  |  |  |  |  |  |  |      |  |  |  |  |  |  |  |  |  |            |  |  |  |  |  |  |  |  |  |             |  |  |  |  |  |  |  |  |  |  |                                                                                                                                                                                                                                                                                                                                                                                                                                                                                                                                                                                               |
| <p>Causes of collapse</p> | <p>Significant presence of:</p> <ul style="list-style-type: none"> <li><input type="checkbox"/> collapse of external cladding without damage to structural elements</li> <li><input type="checkbox"/> severe damage to structural elements (pillars and beams) without building collapse</li> <li><input type="checkbox"/> severe damage/collapse to/of building structure</li> <li><input type="checkbox"/> severe damage to foundations without building collapse</li> <li><input type="checkbox"/> severe damage to foundations</li> </ul>                                                                                                                                                                                                                                                                                                                                                                                                                                                                                                                                                                                                                                                                                                     |         |              |               |         |               |               |         |               |  |  |  |      |         |      |      |         |      |      |         |      |         |  |  |  |  |  |  |  |  |  |          |  |  |  |  |  |  |  |  |  |       |  |  |  |  |  |  |  |  |  |        |  |  |  |  |  |  |  |  |  |      |  |  |  |  |  |  |  |  |  |            |  |  |  |  |  |  |  |  |  |             |  |  |  |  |  |  |  |  |  |  |                                                                                                                                                                                                                                                                                                                                                                                                                                                                                                                                                                                               |

|  |  |                                                                                                                                                                                     |  |  |
|--|--|-------------------------------------------------------------------------------------------------------------------------------------------------------------------------------------|--|--|
|  |  | <ul style="list-style-type: none"> <li>and building collapse</li> <li><input type="checkbox"/> building displacement</li> <li><input type="checkbox"/> building rotation</li> </ul> |  |  |
|--|--|-------------------------------------------------------------------------------------------------------------------------------------------------------------------------------------|--|--|

**DAMAGE TO STRUCTURE – Masonry/Wood buildings**

|                    |                                                                                                                                                                                                                                                                                    |              |           |        |               |           |        |               |           |                                                                                                                                                                                                                                                                                                                                                                                                                                                                                                                                                                                               |        |
|--------------------|------------------------------------------------------------------------------------------------------------------------------------------------------------------------------------------------------------------------------------------------------------------------------------|--------------|-----------|--------|---------------|-----------|--------|---------------|-----------|-----------------------------------------------------------------------------------------------------------------------------------------------------------------------------------------------------------------------------------------------------------------------------------------------------------------------------------------------------------------------------------------------------------------------------------------------------------------------------------------------------------------------------------------------------------------------------------------------|--------|
| Structural damage  | <input type="checkbox"/> Yes <input type="checkbox"/> No                                                                                                                                                                                                                           |              |           |        |               |           |        |               |           | <p>Specify, for each degree of damage severity, the portion of affected elements with respect to total elements in the building.</p> <p>Damage is to be considered “light” when the strength of the element is not compromised, there is no danger for occupants because of collapse /fallen objects</p> <p>Damage is to be considered “medium” when the strength of the element could be compromised, leading to its collapse. Falling objects are possible.</p> <p>Damage is to be considered “severe” when the strength of the element is compromised and collapse occurred/is likely.</p> |        |
|                    |                                                                                                                                                                                                                                                                                    | Light Damage |           |        | Medium Damage |           |        | Severe Damage |           |                                                                                                                                                                                                                                                                                                                                                                                                                                                                                                                                                                                               |        |
|                    |                                                                                                                                                                                                                                                                                    | $<1/3$       | $1/3-2/3$ | $>2/3$ | $<1/3$        | $1/3-2/3$ | $>2/3$ | $<1/3$        | $1/3-2/3$ |                                                                                                                                                                                                                                                                                                                                                                                                                                                                                                                                                                                               | $>2/3$ |
|                    | Vertical structures                                                                                                                                                                                                                                                                |              |           |        |               |           |        |               |           |                                                                                                                                                                                                                                                                                                                                                                                                                                                                                                                                                                                               |        |
|                    | Floors                                                                                                                                                                                                                                                                             |              |           |        |               |           |        |               |           |                                                                                                                                                                                                                                                                                                                                                                                                                                                                                                                                                                                               |        |
|                    | Stairs                                                                                                                                                                                                                                                                             |              |           |        |               |           |        |               |           |                                                                                                                                                                                                                                                                                                                                                                                                                                                                                                                                                                                               |        |
|                    | Roof                                                                                                                                                                                                                                                                               |              |           |        |               |           |        |               |           |                                                                                                                                                                                                                                                                                                                                                                                                                                                                                                                                                                                               |        |
|                    | Partitions                                                                                                                                                                                                                                                                         |              |           |        |               |           |        |               |           |                                                                                                                                                                                                                                                                                                                                                                                                                                                                                                                                                                                               |        |
| Foundations        |                                                                                                                                                                                                                                                                                    |              |           |        |               |           |        |               |           |                                                                                                                                                                                                                                                                                                                                                                                                                                                                                                                                                                                               |        |
| Causes of collapse | <p>Significant presence of:</p> <ul style="list-style-type: none"> <li><input type="checkbox"/> severe damage/collapse of ground wall because of flood wave without building collapse</li> <li><input type="checkbox"/> severe damage/collapse to/of building structure</li> </ul> |              |           |        |               |           |        |               |           |                                                                                                                                                                                                                                                                                                                                                                                                                                                                                                                                                                                               |        |

|                             |  |                                                                                                                                                                                                                                                               |  |                                                                                                                                       |
|-----------------------------|--|---------------------------------------------------------------------------------------------------------------------------------------------------------------------------------------------------------------------------------------------------------------|--|---------------------------------------------------------------------------------------------------------------------------------------|
|                             |  | <input type="checkbox"/> severe damage to foundations without building collapse<br><input type="checkbox"/> severe damage to foundation and building collapse<br><input type="checkbox"/> building displacement<br><input type="checkbox"/> building rotation |  |                                                                                                                                       |
|                             |  | _ _ _ _ _ _ _ _ _ _ _ _ _ _ _ _  €                                                                                                                                                                                                                            |  | Specify the economic value of damage.                                                                                                 |
| Damage to coating/plaster   |  | <input type="checkbox"/> Yes <input type="checkbox"/> No<br> _ _ _ _  damaged surface [m <sup>2</sup> ]                                                                                                                                                       |  |                                                                                                                                       |
|                             |  | _ _ _ _ _ _ _ _ _ _ _ _ _ _ _ _  €                                                                                                                                                                                                                            |  | Specify the economic value of damage.                                                                                                 |
| Damage to doors and windows |  | <input type="checkbox"/> Yes <input type="checkbox"/> No<br>N° of damaged doors  _ _ <br> _ _ _ _  damaged surface [m <sup>2</sup> ]<br>N° of damaged windows  _ _ <br> _ _ _ _  damaged surface [m <sup>2</sup> ]                                            |  | Windows/doors are “damaged” if they need to be fixed/replaced. On the contrary, incurred costs must be considered as “clean-up cost”. |
|                             |  | _ _ _ _ _ _ _ _ _ _ _ _ _ _ _ _  €                                                                                                                                                                                                                            |  | Specify the economic value of damage.                                                                                                 |
| Damage to floors            |  | <input type="checkbox"/> Yes <input type="checkbox"/> No<br> _ _ _ _  damaged surface [m <sup>2</sup> ]                                                                                                                                                       |  | Pavements are “damaged” if they need to be fixed/replaced. On the contrary, incurred costs must be considered as “clean-up cost”.     |

|                                    |  |                                                                                                                                                                           |  |                                                                        |
|------------------------------------|--|---------------------------------------------------------------------------------------------------------------------------------------------------------------------------|--|------------------------------------------------------------------------|
|                                    |  | <p style="text-align: center;"> _ _ _ _ _ _ _ _ _ _ _ _ _ _ _  €</p>                                                                                                      |  | Specify the economic value of damage.                                  |
| Damage to technological systems    |  | <input type="checkbox"/> plumbing system<br><input type="checkbox"/> electrical system<br><input type="checkbox"/> heating system<br><input type="checkbox"/> Other _____ |  |                                                                        |
|                                    |  | <p style="text-align: center;"> _ _ _ _ _ _ _ _ _ _ _ _ _ _ _  €</p>                                                                                                      |  | Specify the economic value of damage.                                  |
| <b>Damage to structure - Total</b> |  | <p style="text-align: center;"> _ _ _ _ _ _ _ _ _ _ _ _ _ _ _  €</p>                                                                                                      |  | Specify the economic value of damage, as the sum of previous headings. |
| <b>DAMAGE TO CONTENTS</b>          |  |                                                                                                                                                                           |  |                                                                        |
| Damage to furniture                |  | <input type="checkbox"/> Yes <input type="checkbox"/> No                                                                                                                  |  |                                                                        |
|                                    |  | <p style="text-align: center;"> _ _ _ _ _ _ _ _ _ _ _ _ _ _ _  €</p>                                                                                                      |  | Specify the economic value of damage.                                  |
| Damage to household appliances     |  | <input type="checkbox"/> Yes <input type="checkbox"/> No<br>Specify: _____<br>_____                                                                                       |  |                                                                        |
|                                    |  | <p style="text-align: center;"> _ _ _ _ _ _ _ _ _ _ _ _ _ _ _  €</p>                                                                                                      |  | Specify the economic value of damage.                                  |
| Other                              |  | Specify: _____<br>_____                                                                                                                                                   |  |                                                                        |
|                                    |  | <p style="text-align: center;"> _ _ _ _ _ _ _ _ _ _ _ _ _ _ _  €</p>                                                                                                      |  | Specify the economic value of damage.                                  |

|                                       |  |                                                                                                                                                                                                                                                                                      |              |                                                                                                                                                                     |
|---------------------------------------|--|--------------------------------------------------------------------------------------------------------------------------------------------------------------------------------------------------------------------------------------------------------------------------------------|--------------|---------------------------------------------------------------------------------------------------------------------------------------------------------------------|
| <b>Damage to contents - Total</b>     |  | LLLLLLLLLLLLLLLL €                                                                                                                                                                                                                                                                   |              | Specify the economic value of damage, as the sum of previous headings.                                                                                              |
| <b>Direct damage - Total</b>          |  | LLLLLLLLLLLLLLLL €                                                                                                                                                                                                                                                                   |              | Specify the economic value of damage, as the sum of previous headings.                                                                                              |
| <b>Section 7C- Indirect damage</b>    |  | <b>Data</b>                                                                                                                                                                                                                                                                          | <b>Notes</b> | <b>Guidelines</b>                                                                                                                                                   |
| Lack of usability                     |  | <input type="checkbox"/> Yes <input type="checkbox"/> No<br>Duration                  LLLLLL days<br>Causes _____<br>_____                                                                                                                                                           |              |                                                                                                                                                                     |
| Clean-up costs                        |  | <input type="checkbox"/> Yes <input type="checkbox"/> No                                                                                                                                                                                                                             |              | Clean-up costs relate, for example, to the following activities: cleaning, debris removal, clearing, etc.                                                           |
|                                       |  | <input type="checkbox"/> private work<br>LLLLLLLLLLLLLLLL €<br>LLLLLLLLLL days/person<br><input type="checkbox"/> public work                                                                                                                                                        |              | Indicate if clean-up was done by private citizens or local authorities. In the first case, please specify incurred costs or required job (in terms of days/person). |
| <b>Section 7D- Mitigation factors</b> |  | <b>Data</b>                                                                                                                                                                                                                                                                          | <b>Notes</b> | <b>Guidelines</b>                                                                                                                                                   |
| Mitigation actions                    |  | <input type="checkbox"/> None<br><input type="checkbox"/> Suction pumps<br><input type="checkbox"/> Retaining walls<br><input type="checkbox"/> Moving objects at upper floors<br><input type="checkbox"/> Power interruption / switching off<br><input type="checkbox"/> Evacuation |              |                                                                                                                                                                     |

|  |  |                                                                                                                                                                     |  |  |
|--|--|---------------------------------------------------------------------------------------------------------------------------------------------------------------------|--|--|
|  |  | <input type="checkbox"/> Other _____<br>Time:<br>Hour                    LL   LL  <br>Date                    LL   LL   LL  <br>Motivation: _____<br>_____<br>_____ |  |  |
|--|--|---------------------------------------------------------------------------------------------------------------------------------------------------------------------|--|--|

**SECTION 8 – ATTACHMENTS**

- Building Plan (1:100)
- Photos to identify buildings
- Photos to identify reference point for water depth record
- Photos of damaged items
